# Supplementary material for: SARS-CoV-2 breakthrough infections among vaccinated individuals with rheumatic disease: results from the COVID-19 Global Rheumatology Alliance provider registry
Source: HighWire-hosted journal article supplement (doi:10.1136/rmdopen-2021-002187), 2022-04-01
Supplement: rmdopen-2021-002187supp001_data_supplement.pdf [file rmdopen-2021-002187supp001_data_supplement.pdf]

**Supplementary Table 1. Demographic and disease characteristics of individuals with rheumatic disease diagnosed with SARS-CoV-2 infection after vaccination reported to the C19-GRA registry (n=197)**

|                                | Frequency (%) or Mean (SD) |                 |
|--------------------------------|----------------------------|-----------------|
|                                | Overall (n=197)            | Partial (n=110) |
| <b>Mean age (years), SD</b>    | 53.2 (16.2)                | 52.8 (16.1%)    |
| <b>Female</b>                  | 143 (72.6%)                | 76 (69.1%)      |
| <b>Race or ethnicity</b>       |                            |                 |
| White                          | 109 (55.3%)                | 60 (54.6%)      |
| Black                          | 13 (6.6%)                  | 7 (6.4%)        |
| Latin American                 | 14 (7.1%)                  | 4 (3.6%)        |
| East or South Asian            | 29 (14.7%)                 | 22 (20.0%)      |
| Other                          | 25 (12.7%)                 | 16 (14.6%)      |
| Unknown                        | 7 (3.6%)                   | 1 (0.9%)        |
| <b>WHO Regions</b>             |                            |                 |
| African Region                 | 5 (2.5%)                   | 3 (2.7%)        |
| Region of the Americas - North | 32 (16.2%)                 | 25 (22.7%)      |
| Region of the Americas - South | 27 (13.7%)                 | 19 (17.3%)      |
| South-East Asian Region        | 115 (58.4%)                | 50 (45.5%)      |
| European Region                | 2 (1.0%)                   | 1 (0.9%)        |
| Eastern Mediterranean Region   | 1 (0.5%)                   | 1 (0.9%)        |
| Western Pacific Region         | 15 (7.6%)                  | 11 (10.0%)      |
| <b>Rheumatic Disease+</b>      |                            |                 |
| Rheumatoid Arthritis           | 85 (43.2%)                 | 51 (46.4%)      |
| Systemic Lupus Erythematosus   | 30 (15.4%)                 | 20 (18.2%)      |
| Psoriatic Arthritis            | 19 (9.6%)                  | 7 (6.4%)        |

|                                                |             |            |
|------------------------------------------------|-------------|------------|
| Vasculitis                                     | 17 (8.6%)   | 7 (6.4%)   |
| Inflammatory Myopathy                          | 13 (6.6%)   | 5 (4.6%)   |
| Spondyloarthritis (Axial and other)            | 12 (6.1%)   | 9 (8.2%)   |
| Sjogren's Syndrome                             | 7 (3.6%)    | 3 (2.7%)   |
| Systemic Sclerosis                             | 5 (2.5%)    | 1 (0.9%)   |
| Gout                                           | 3 (1.5%)    | 3 (2.7%)   |
| Other                                          | 15 (7.6%)   | 7 (6.4%)   |
| <b>Comorbidity Count</b>                       |             |            |
| 0                                              | 106 (53.8%) | 60 (54.6%) |
| 1                                              | 59 (30.0%)  | 33 (30.0%) |
| ≥ 2                                            | 32 (16.2%)  | 17 (15.5%) |
| <b>Most Common Comorbidities</b>               |             |            |
| Hypertension                                   | 56 (28.4%)  | 32 (29.1%) |
| Obesity                                        | 42 (21.3%)  | 24 (21.8%) |
| Lung disease                                   | 33 (16.8%)  | 17 (15.5%) |
| Diabetes                                       | 23 (11.7%)  | 14 (12.7%) |
| Chronic kidney disease                         | 12 (6.1%)   | 4 (3.6%)   |
| <b>Medication Prior to COVID-19 Diagnosis^</b> |             |            |
| No DMARD                                       | 27 (13.7%)  | 21 (19.1%) |
| csDMARDs                                       | 125 (63.5%) | 68 (61.8%) |
| Methotrexate                                   | 54 (27.4%)  | 33 (30.0%) |
| Hydroxychloroquine                             | 51 (25.9%)  | 26 (23.6%) |
| Leflunomide                                    | 13 (6.6%)   | 7 (6.4%)   |
| Azathioprine                                   | 10 (5.1%)   | 4 (3.6%)   |
| Mycophenolate                                  | 21 (10.7%)  | 11 (10.0%) |
| Sulfasalazine                                  | 10 (5.1%)   | 6 (5.5%)   |

|                                                             |                |                |
|-------------------------------------------------------------|----------------|----------------|
| Colchicine                                                  | 6 (3.1%)       | 4 (3.6%)       |
| <i>b/tsDMARDs</i>                                           | 88 (44.7%)     | 37 (33.6%)     |
| BCDT                                                        | 22 (11.2%)     | 6 (5.5%)       |
| TNF inhibitors                                              | 37 (18.8%)     | 18 (16.4%)     |
| Other biologics**                                           | 17 (8.6%)      | 7 (6.4%)       |
| JAK inhibitors                                              | 12 (6.1%)      | 6 (5.5%)       |
| <b>Glucocorticoid Dose</b>                                  | <b>(N=191)</b> | <b>(N=106)</b> |
| 0 mg/day                                                    | 128 (67.0%)    | 67 (60.9%)     |
| 1-9 mg/day                                                  | 45 (23.6%)     | 27 (24.5%)     |
| ≥ 10 mg/day                                                 | 18 (9.4%)      | 12 (10.9%)     |
| <b>Disease Activity</b>                                     | <b>(N=196)</b> | <b>(N=109)</b> |
| Remission/Low                                               | 155 (79.1%)    | 86 (78.2%)     |
| Moderate/High                                               | 41 (20.9%)     | 23 (20.9%)     |
| <b>Confirmed COVID-19#</b>                                  | 191 (97.0%)    | 104 (94.5%)    |
| <b>Vaccine</b>                                              |                |                |
| Pfizer-BioNtech                                             | 108 (54.8%)    | 63 (57.3%)     |
| Moderna                                                     | 31 (15.7%)     | 10 (9.1%)      |
| Astra Zeneca/Oxford                                         | 23 (11.7%)     | 17 (15.5%)     |
| Sinovac                                                     | 11 (5.6%)      | 6 (5.5%)       |
| Janssen/Johnson & Johnson                                   | 10 (5.1%)      | 4 (3.6%)       |
| Don't Know/Missing                                          | 10 (5.1%)      | 6 (5.5%)       |
| Other                                                       | 4 (2.0%)       | 4 (3.6%)       |
| <b>Number of Doses Received (excluding J&amp;J) (N=187)</b> |                | --             |
| 1                                                           | 42 (22.5%)     | --             |
| 2                                                           | 141 (75.4%)    | --             |

|                                                                                                    |             |    |
|----------------------------------------------------------------------------------------------------|-------------|----|
| Unknown                                                                                            | 4 (2.1%)    | -- |
| <b>Infection after first or second dose, among those who ultimately received two doses (N=141)</b> |             | -- |
| 1                                                                                                  | 13 (9.2%)   | -- |
| 2                                                                                                  | 119 (84.4%) | -- |
| Unknown                                                                                            | 9 (4.6%)    | -- |
| <b>Fully vaccinated*</b>                                                                           | 87 (44.2%)  | -- |

+Cases could have more than one disease diagnosis

^Conventional synthetic DMARD (csDMARD) medications included: antimalarials (hydroxychloroquine, chloroquine), azathioprine, cyclophosphamide, cyclosporine, leflunomide, methotrexate, mycophenolate mofetil/mycophenolic acid, sulfasalazine, tacrolimus; Biologic or targeted synthetic DMARDs (b/tsDMARD) included: abatacept, belimumab, CD-20 inhibitors, IL-1 inhibitors, IL-6 inhibitors, IL-12/23 inhibitors, IL-17 inhibitors, anti-TNF, and Janus-kinase inhibitors

#Confirmed COVID-19 diagnosis: Diagnosis made via PCR, antigen, or antibody test.

\*Fully vaccinated: infection  $\geq 14$  days after 2<sup>nd</sup> dose of two dose vaccine, or 1<sup>st</sup> if Janssen/Johnson & Johnson

\*\*Other biologics include: abatacept (n=6); IL-6 (n=4); IL-17, belimumab, IL-1 (n=2); cyclosporine, tacrolimus, ustekinumab (n=1).

**Supplemental Table 2. Baseline medications at the time of SARS-CoV-2 infection in individuals with rheumatic disease who were previously vaccinated**

|                           | <b>Overall<br/>(n=197)</b> | <b>Fully Vaccinated<br/>(n=87)</b> | <b>Fully Vaccinated<br/>and Hospitalized<br/>(n=22)</b> |
|---------------------------|----------------------------|------------------------------------|---------------------------------------------------------|
| <u>csDMARDs</u>           | 125 (63.5%)                | 57 (65.5%)                         | 10 (45.5%)                                              |
| Methotrexate              | 54 (27.4%)                 | 21 (24.1%)                         | 2 (9.1%)                                                |
| Hydroxychloroquine        | 51 (25.9%)                 | 25 (28.7%)                         | 2 (9.1%)                                                |
| Leflunomide               | 13 (6.6%)                  | 6 (6.9%)                           | 2 (9.1%)                                                |
| Azathioprine              | 10 (5.1%)                  | 6 (6.9%)                           | 2 (9.1%)                                                |
| Mycophenolate             | 21 (10.7%)                 | 10 (11.5%)                         | 3 (13.6%)                                               |
| Sulfasalazine             | 10 (5.1%)                  | 4 (4.6%)                           | --                                                      |
| Colchicine                | 6 (3.1%)                   | 2 (2.3%)                           | --                                                      |
| <u>b/tsDMARDs</u>         | 88 (44.7%)                 | 51 (58.6%)                         | 17 (77.3%)                                              |
| BCDT                      | 22 (11.2%)                 | 16 (18.4%)                         | 10 (45.5%)                                              |
| TNF inhibitors            | 37 (18.8%)                 | 19 (21.8%)                         | 2 (9.1%)                                                |
| Other biologics*          | 17 (8.6%)                  | 10 (11.5%)                         | 4 (18.2%)                                               |
| JAK inhibitors            | 12 (6.1%)                  | 6 (6.9%)                           | 1 (4.6%)                                                |
| <i>Steroids</i>           |                            |                                    |                                                         |
| Glucocorticoids** (n=131) |                            |                                    |                                                         |
| 0 mg/day                  | 128 (67.0%)                | 61 (71.8%)                         | 14 (63.6%)                                              |
| 1-9 mg/day                | 45 (23.6%)                 | 18 (21.2%)                         | 4 (18.2%)                                               |
| >= 10 mg/day              | 18 (9.4%)                  | 6 (7.1%)                           | 4 (18.2%)                                               |

\*Other biologics include: abatacept, belimumab, IL-1, IL-6, IL-12/23, IL-17, ustekinumab

Overall: abatacept (n=6); IL-6 (n=4); IL-17, belimumab, IL-1 (n=2); cyclosporine, tacrolimus, ustekinumab (n=1).

Fully vaccinated: abatacept (n=4); IL-6, IL-1 (n=2); belimumab, ustekinumab (n=1)

Fully vaccinated & hospitalized: abatacept, IL-6, belimumab, ustekinumab (n=1)

\*\*Prednisone-equivalent doses

**Supplemental Table 3. Medication status at time of vaccination among the fully vaccinated (n=79 with available information)**

| <b>Medication discontinued before vaccine</b> |                                               |
|-----------------------------------------------|-----------------------------------------------|
|                                               | <b>Timing relative to vaccine</b>             |
| Glucocorticoids, n=3                          | At either vaccine dose                        |
| Hydroxychloroquine, n=1                       | Before dose 1 and dose 2                      |
| Methotrexate, n=1                             | Before dose 1 and dose 2                      |
| TNF inhibitor, n=1                            | Before dose 1 and dose 2                      |
| Azathioprine, n=1                             | Before dose 2                                 |
| <b>Medication discontinued after vaccine</b>  |                                               |
|                                               | <b>Timing relative to vaccine</b>             |
| Azathioprine, n=2                             | 1: After dose 1 and dose 2<br>1: After dose 2 |
| Methotrexate, n=1                             | After dose 1 and dose 2                       |
| TNF inhibitor, n=1                            | After dose 1 and dose 2                       |
| JAK inhibitor, n=1                            | After dose 1 and dose 2                       |
